# Supplementary material
Source: publisher figshare collection journal article supplement (https://gsajournals.figshare.com/ndownloader/files/27463619)
Supplement: Supplementary file 1 [file 27463619]

## Sheet: Table S1
Table S1. Extended list of enriched categories from GSEA among genes analyzed for the interaction and main effects of weaning stress, maternal immune activation, and sex (at least one model term significant at P-value < 0.05).
	MIA*Sex	MIA*Sex	MIA*Sex	Wean*MIA	Wean*MIA	Wean*MIA	Wean*Sex	Wean*Sex	Wean*Sex	Sex	Sex	Sex	Wean	Wean	Wean	MIA	MIA	MIA
KEGG Pathwaya	NESb	P-value	FDR P-valuec	NES	P-value	FDR P-value	NES	P-value	FDR P-value	NES	P-value	FDR P-value	NES	P-value	FDR P-value	NES	P-value	FDR P-value
ssc00020:Citrate cycle (TCA cycle)	-1.6	0.0261	0.237	-1.33	0.141	0.83	-1.6	0.0339	0.349	1.61	0.0592	0.953
ssc00071:Fatty acid degradation	-1.63	0.0184	0.273													-1.34	0.116	0.452
ssc00100:Steroid biosynthesis	-1.37	0.141	0.445										-1.79	0.00579	0.0437
ssc00140:Steroid hormone biosynthesis				1.59	0.0411	0.0756										1.65	0.0128	0.573
ssc00190:Oxidative phosphorylation	-2.29	0d	0	-1.32	0.0877	0.728	-1.92	0.00301	0.164	1.48	0.0724	0.662				-1.34	0.0669	0.451
ssc00220:Arginine biosynthesis													-1.75	0.00644	0.038
ssc00270:Cysteine and methionine metabolism													1.55	0.0376	0.768
ssc00280:Valine, leucine and isoleucine degradation	-1.46	0.0458	0.382
ssc00310:Lysine degradation							1.45	0.0274	0.858
ssc00350:Tyrosine metabolism	-1.6	0.027	0.24				-1.32	0.156	0.495	1.31	0.156	0.719
ssc00360:Phenylalanine metabolism	-1.7	0.0196	0.202							1.46	0.092	0.667
ssc00480:Glutathione metabolism	-1.83	0.00459	0.0727				-1.68	0.017	0.316	1.37	0.11	0.708
ssc00500:Starch and sucrose metabolism				1.49	0.0405	0.132
ssc00512:Mucin type O-glycan biosynthesis							-1.68	0.0226	0.295				1.46	0.0686	0.725
ssc00531:Glycosaminoglycan degradation				1.5	0.0646	0.123
ssc00565:Ether lipid metabolism													-1.56	0.0159	0.115
ssc00590:Arachidonic acid metabolism	-1.63	0.0184	0.287													-1.56	0.033	0.207
ssc00790:Folate biosynthesis	-1.63	0.0302	0.254				-1.56	0.0466	0.41	1.34	0.163	0.739
ssc00900:Terpenoid backbone biosynthesis				-1.32	0.133	0.798							-1.62	0.012	0.0884
ssc00982:Drug metabolism	-1.56	0.0328	0.279
ssc00983:Drug metabolism	-1.66	0.00727	0.253				-1.45	0.0652	0.418
ssc01100:Metabolic pathways	-1.49	0	0.367				-1.35	0.00111	0.457
ssc01230:Biosynthesis of amino acids													-1.44	0.0234	0.207
ssc03010:Ribosome	-2.45	0	0				-2.21	0	0.0743	1.37	0.123	0.699	2.2	0	0.0537	-1.95	0.00155	0.0781
ssc03060:Protein export	-1.39	0.109	0.433				-1.54	0.0492	0.4	1.39	0.135	0.701
ssc03320:PPAR signaling pathway				1.45	0.0494	0.159
ssc03410:Base excision repair													-1.5	0.0319	0.154
ssc04060:Cytokine-cytokine receptor interaction	-1.39	0.0537	0.425	1.4	0.00552	0.202	-1.36	0.047	0.442	1.6	0.0339	0.728				-1.54	0.0216	0.24
ssc04062:Chemokine signaling pathway																-1.57	0.012	0.223
ssc04064:NF-kappa B signaling pathway				1.32	0.0885	0.272										-1.71	0.00172	0.115
ssc04080:Neuroactive ligand-receptor interaction	-1.97	0	0.0103	-1.53	0.00606	0.961	-1.99	0	0.127				1.47	0.0114	0.792	-1.38	0.0454	0.401
ssc04141:Protein processing in endoplasmic reticulum							-1.48	0.0224	0.409	1.34	0.129	0.73
ssc04145:Phagosome	1.62	0	0.0491	2.17	0	0.000276							-1.42	0.0169	0.228	-1.89	0.00147	0.0697
ssc04146:Peroxisome	-1.55	0.0193	0.289
ssc04151:PI3K-Akt signaling pathway	-1.36	0.0172	0.43							1.6	0.0106	0.766				-1.32	0.0396	0.487
ssc04260:Cardiac muscle contraction	-1.61	0.0174	0.238	-1.41	0.0734	0.984	-1.52	0.0339	0.364
ssc04270:Vascular smooth muscle contraction							-1.42	0.0471	0.405
ssc04310:Wnt signaling pathway	-1.43	0.0296	0.396				-1.36	0.0634	0.451	1.53	0.0519	0.667	1.31	0.0938	0.52
ssc04360:Axon guidance				-1.32	0.062	0.739	-1.4	0.0456	0.411	1.38	0.0835	0.709
ssc04514:Cell adhesion molecules (CAMs)	1.37	0.0274	0.204	1.88	0	0.00673							-1.54	0.00641	0.129	-1.83	0.00155	0.0928
ssc04530:Tight junction	-1.43	0.0259	0.415
ssc04610:Complement and coagulation cascades				1.74	0.00503	0.0268
ssc04612:Antigen processing and presentation	2.54	0	0	2.59	0	0				-1.73	0.00617	0.15	-2.18	0	0	-1.64	0.0182	0.156
ssc04621:NOD-like receptor signaling pathway				1.6	0	0.0766							-1.35	0.0275	0.318	-1.47	0.03	0.288
ssc04622:RIG-I-like receptor signaling pathway	1.74	0.00305	0.0217	1.64	0.0163	0.0558
ssc04623:Cytosolic DNA-sensing pathway	1.37	0.0744	0.205	2.06	0	0.00052							-1.59	0.0204	0.108
ssc04630:JAK-STAT signaling pathway	-1.31	0.116	0.449				-1.53	0.0306	0.389	1.62	0.0495	0.968
ssc04640:Hematopoietic cell lineage	1.49	0.00673	0.108	2.06	0	0.000552							-1.62	0.00594	0.0836	-1.99	0	0.0812
ssc04650:Natural killer cell mediated cytotoxicity				1.38	0.047	0.216										-1.59	0.0182	0.195
ssc04657:IL-17 signaling pathway				1.44	0.0371	0.164
ssc04658:Th1 and Th2 cell differentiation	1.72	0	0.024	2.11	0	0.000237							-1.58	0.0101	0.104	-1.5	0.0367	0.265
ssc04659:Th17 cell differentiation	1.65	0.00791	0.0388	2.03	0	0.00093							-1.52	0.0144	0.14	-1.46	0.0407	0.294
ssc04662:B cell receptor signaling pathway																-1.79	0.011	0.0919
ssc04664:Fc epsilon RI signaling pathway																-1.83	0.00499	0.0788
ssc04666:Fc gamma R-mediated phagocytosis																-1.72	0.0048	0.112
ssc04668:TNF signaling pathway				1.58	0.00265	0.079
ssc04670:Leukocyte transendothelial migration	-1.33	0.084	0.456							1.42	0.0754	0.666				-1.53	0.0341	0.239
ssc04672:Intestinal immune network for IgA production	1.79	0.00836	0.0136	2.14	0	0.000255							-1.77	0.00399	0.0368	-1.79	0.00725	0.0964
ssc04714:Thermogenesis	-1.76	0	0.124	-1.45	0.0226	0.917	-1.67	0.00693	0.29
ssc04720:Long-term potentiation							-1.35	0.0948	0.451				1.51	0.0366	0.735
ssc04723:Retrograde endocannabinoid signaling	-1.41	0.0362	0.423	-1.64	0.00456	0.934	-1.73	0.00292	0.261				1.64	0.00904	0.632
ssc04726:Serotonergic synapse													1.39	0.0443	0.681
ssc04728:Dopaminergic synapse							-1.46	0.0408	0.444
ssc04730:Long-term depression				-1.51	0.0486	0.8
ssc04740:Olfactory transduction	1.51	0.0161	0.0938							-1.61	0.0118	0.102				1.51	0.0154	0.913
ssc04744:Phototransduction							1.34	0.144	0.899	-1.7	0.0162	0.07	-1.42	0.094	0.224
ssc04912:GnRH signaling pathway	-1.37	0.0606	0.427				-1.78	0.0127	0.216
ssc04913:Ovarian steroidogenesis	-1.54	0.0431	0.3				-1.82	0.00888	0.196	1.9	0.0229	0.879
ssc04916:Melanogenesis	-1.54	0.0227	0.294	-1.31	0.104	0.693	-1.56	0.0312	0.392
ssc04917:Prolactin signaling pathway	-1.59	0.01	0.24				-2.05	0.00664	0.205	1.96	0.00147	0.774
ssc04918:Thyroid hormone synthesis	-1.49	0.0314	0.363				-1.64	0.0169	0.303				1.34	0.0949	0.56
ssc04920:Adipocytokine signaling pathway	-1.37	0.0794	0.436				-1.64	0.0213	0.313	1.45	0.094	0.651
ssc04921:Oxytocin signaling pathway				-1.36	0.0625	0.957							1.42	0.0417	0.734
ssc04923:Regulation of lipolysis in adipocytes	-1.62	0.0238	0.256				-1.92	0.0068	0.144				1.64	0.0238	0.758
ssc04927:Cortisol synthesis and secretion							-1.44	0.0438	0.42	1.49	0.0727	0.693
ssc04932:Non-alcoholic fatty liver disease (NAFLD)	-2.11	0	0.00135	-1.61	0.00627	0.842	-2.01	0	0.184	1.49	0.0616	0.676				-1.76	0.00465	0.097
ssc04934:Cushing syndrome	-1.39	0.0431	0.418	-1.33	0.0766	0.865	-1.43	0.0382	0.409	1.59	0.0328	0.701
ssc04940:Type I diabetes mellitus	2.44	0	0	2.4	0	0				-1.72	0.00503	0.0849	-2.14	0	0.000231	-1.7	0.014	0.121
ssc04950:Maturity onset diabetes of the young	-1.46	0.0829	0.403													-1.65	0.0184	0.155
ssc04961:Endocrine and other factor-regulated calcium reabsorption	-1.33	0.108	0.449				-1.52	0.0306	0.371	1.45	0.1	0.658
ssc05010:Alzheimer disease	-2	0	0.00799	-1.35	0.0543	0.944	-1.92	0.00148	0.127
ssc05012:Parkinson disease	-2.15	0	0.00108	-1.46	0.0355	0.942	-2	0	0.139	1.55	0.0503	0.704				-1.43	0.0429	0.345
ssc05016:Huntington disease	-1.37	0.0438	0.426										-1.49	0.0043	0.152
ssc05020:Prion diseases				1.52	0.0465	0.108
ssc05030:Cocaine addiction	-1.46	0.0452	0.389				-1.46	0.0627	0.423	1.31	0.147	0.698
ssc05033:Nicotine addiction				-1.53	0.0329	0.824	-1.49	0.0595	0.414	1.31	0.166	0.736
ssc05034:Alcoholism	-1.35	0.071	0.44				-1.43	0.0455	0.437
ssc05133:Pertussis				1.45	0.0442	0.16	1.43	0.0241	0.766							-1.4	0.0574	0.378
ssc05140:Leishmaniasis	1.84	0	0.0099	1.93	0	0.00321										-1.91	0	0.0895
ssc05142:Chagas disease (American trypanosomiasis)																-1.49	0.0273	0.281
ssc05143:African trypanosomiasis	-1.62	0.0259	0.243	1.48	0.0501	0.132	-1.54	0.0519	0.384	1.61	0.0578	0.835	1.55	0.0461	0.888	-1.57	0.0294	0.216
ssc05145:Toxoplasmosis	1.66	0.00403	0.0378	1.68	0	0.0417							-1.32	0.0742	0.364	-1.46	0.03	0.298
ssc05146:Amoebiasis										1.61	0.0434	0.783				-1.56	0.0232	0.212
ssc05150:Staphylococcus aureus infection	2.13	0	0.000163	2.46	0	0							-1.76	0.00613	0.0376	-1.99	0	0.12
ssc05152:Tuberculosis	1.44	0.00844	0.144	1.74	0.00276	0.0272										-1.63	0.0135	0.157
ssc05160:Hepatitis C				1.54	0.00532	0.0961							-1.56	0.0104	0.115
ssc05162:Measles				1.69	0	0.041										-1.9	0	0.0795
ssc05163:Human cytomegalovirus infection				1.32	0.0267	0.264
ssc05164:Influenza A	1.98	0	0.00285	2.08	0	0.000276							-1.69	0	0.0542	-1.73	0.00307	0.116
ssc05166:Human T-cell leukemia virus 1 infection				1.59	0	0.077										-1.36	0.0471	0.45
ssc05168:Herpes simplex infection	2.05	0	0.00149	2.21	0	0.000201							-1.72	0.00216	0.0449	-1.65	0.0092	0.158
ssc05169:Epstein-Barr virus infection	1.6	0	0.0538	2.09	0	0.000221							-1.77	0	0.0402	-1.87	0	0.0727
ssc05170:Human immunodeficiency virus 1 infection				1.34	0.0256	0.251										-1.36	0.0448	0.447
ssc05200:Pathways in cancer										1.42	0.023	0.68
ssc05217:Basal cell carcinoma	-1.5	0.0386	0.368							1.61	0.0533	0.89
ssc05310:Asthma	1.88	0.00238	0.00756	2.22	0	0.000245							-1.78	0.0141	0.0397	-1.78	0.00375	0.0884
ssc05320:Autoimmune thyroid disease	1.61	0.0153	0.0509	2.43	0	0	-1.54	0.0521	0.42	1.43	0.113	0.677	-2.12	0	0.000369	-1.9	0.00173	0.0725
ssc05321:Inflammatory bowel disease (IBD)	2.03	0	0.00151	2	0	0.00166							-1.59	0.0164	0.106	-1.34	0.107	0.446
ssc05322:Systemic lupus erythematosus	1.87	0	0.00806	2.35	0	0							-1.68	0.00626	0.057	-1.5	0.0254	0.27
ssc05323:Rheumatoid arthritis	1.59	0.0102	0.0545	2.21	0	0.000221										-1.65	0.0119	0.151
ssc05330:Allograft rejection	2.14	0	0.000203	2.44	0	0				-1.4	0.0949	0.396	-2.17	0	0	-1.96	0	0.0809
ssc05332:Graft-versus-host disease	2.32	0	0	2.39	0	0				-1.67	0.0184	0.0749	-2.24	0	0	-1.73	0.00901	0.111
ssc05340:Primary immunodeficiency				1.58	0.0284	0.0769							-1.34	0.117	0.33	-2.12	0.00175	0.0406
ssc05414:Dilated cardiomyopathy (DCM)																-1.53	0.0327	0.237
ssc05416:Viral myocarditis	1.96	0	0.00307	2.42	0	0							-1.89	0.0021	0.0149	-1.83	0.00703	0.0854
ssc05418:Fluid shear stress and atherosclerosis	-1.43	0.0288	0.422				-1.41	0.0433	0.404	1.36	0.107	0.703
aKEGG pathway identifier.
b normalized enrichment score; positive value indicate enrichment among genes over-expressed in pigs from control gilts exposed to weaning stress (CON_WEAN) and from PRRSV-challenged gilts nursing (MPA_NURS); negative values indicate enrichment among genes over-expressed in pigs from control gilts nursing (CON_NURS) and from PRRSV-challenged gilts exposed to weaning stress (MPA_WEAN).
cFalse Discovery Rate adjusted P-value.
d P-value < 0.00001

## Sheet: Table S2
Table S2. P-value (P), FDR-adjusted P-value (FDR) and gene expression profiles (log2(fold change) between pig groups) of functionally annotated genes that presented at least one significant interaction (*) of main effect of weaning, maternal immune activation (MIA), or sex at FDR-adjusted P-value < 0.1.
	MIA	MIA	MIA*Sex	MIA*Sex	Weaning*MIA	Weaning*MIA	Sex	Sex	Weaning*Sex	Weaning*Sex	Weaning	Weaning		MIA*Weaning				W*Sex				MIA*Sex
Symbol	P	FDR	P	FDR	P	FDR	P	FDR	P	FDR	P	FDR	CN-CW	CN-PN	CW-PW	PN-PW	NF-NM	NF-WF	NM-WM	WF-WM	CF-CM	CF-PF	CM-PM	PF-PM
LOC110257905	0.4	1	0.3	1	0.9	1	1e-36	2e-32	0.4	1	0.4	1	0.16	0.08	-0.08	0	-12.56	-1.17	0.08	-11.3	-12.62	-1.26	0.13	-11.23
PYURF	4e-25	7e-21	4e-15	2e-11	2e-17	2e-13	2e-20	3e-17	2e-36	4e-32	2e-20	4e-16	-0.06	-2.35	-0.24	2.05	-0.46	0.09	9.74	9.19	-0.15	-2.03	-1.07	0.82
EIF1AY	0.009	1	0.01	1	0.1	1	6e-34	5e-30	0.2	1	0.2	1	-0.15	-0.07	0.03	-0.05	-11.49	0.29	-0.11	-11.89	-13.01	-1.95	0.09	-10.96
EIF2S3Y	0.06	1	0.09	1	0.8	1	2e-32	8e-29	0.5	1	0.4	1	-0.13	-0.14	-0.02	-0.02	-10.85	0.54	-0.08	-11.47	-12.35	-1.83	0.04	-10.48
GH1	0.8	1	2e-19	3e-15	0.8	1	2e-32	8e-29	7e-22	5e-18	0.4	1	8.9	9.21	-1.04	-1.34	-10.02	-0.44	7.79	-1.8	-9.61	0.4	7.79	-2.22
DDX3Y	0.1	1	0.1	1	0.4	1	9e-32	3e-28	0.3	1	0.3	1	-0.2	-0.19	-0.04	-0.05	-11.16	0.49	-0.13	-11.78	-12.84	-2.08	0	-10.76
LOC100625207	0.3	1	0.4	1	0.3	1	2e-27	4e-24	1	1	0.9	1	-0.19	-0.26	0.04	0.11	-9.51	0.66	-0.04	-10.21	-9.98	-0.27	0.01	-9.69
LOC110255257	0.8	1	0.8	1	0.1	1	2e-24	3e-21	0.1	1	0.1	1	-0.15	-0.19	0.21	0.25	-9.78	0.06	0.04	-9.79	-10.5	-1.11	0.12	-9.27
LOC110257883	0.2	1	0.2	1	1	1	2e-24	3e-21	1	1	1	1	-0.31	-0.41	0.11	0.21	-10.36	0.76	-0.05	-11.17	-11.13	-0.75	-0.04	-10.41
LOC110255204	6e-09	2e-05	3e-17	2e-13	1e-23	2e-19	0.08	1	8e-07	0.003	7e-14	6e-10	-5.03	-3.44	5.61	4.02	5.12	-1.58	-1.6	5.11	5.15	1.45	1.1	4.81
LOC110255320	1	1	1	1	1	1	5e-22	9e-19	1	1	1	1	-0.22	-0.34	-0.19	-0.07	-10.37	0	-0.15	-10.52	-10.36	0	-0.16	-10.52
VHZ	8e-20	7e-16	1e-05	0.008	2e-06	0.005	0.0008	0.3	0.02	1	0.0004	0.9	-1.69	-6.1	-3.43	0.99	1.72	2	-0.78	-1.06	-1.45	-5.85	-3.61	0.79
CGA	0.9	1	2e-13	5e-10	0.5	1	3e-19	4e-16	1e-14	8e-11	0.4	1	5.77	6.12	0.49	0.13	-6.1	-0.24	6.39	0.52	-5.86	0.27	6.49	0.36
OTX2	9e-10	4e-06	6e-17	3e-13	3e-08	0.0001	2e-09	2e-06	5e-06	0.01	0.2	1	2.42	-0.12	0.98	3.52	-0.08	2.84	2.94	0.02	-2.91	-2.88	3.47	3.44
LOC110257894	0.9	1	0.9	1	0.9	1	7e-14	1e-10	1	1	0.9	1	-0.12	-0.28	0.06	0.21	-5.73	0.01	0.04	-5.69	-5.69	0.04	0	-5.73
SIX1	0.5	1	3e-08	3e-05	0.2	1	1e-13	1e-10	9e-09	4e-05	0.0002	0.5	2.07	4.32	0.9	-1.35	-4.57	-2.03	2.59	0.06	-3.13	0.45	3.79	0.21
RGS16	7e-07	0.001	1e-13	4e-10	0.0001	0.2	3e-09	3e-06	1e-05	0.02	0.9	1	3.21	0.68	-0.07	2.45	-0.89	2.54	3.13	-0.3	-3.25	-2.44	3.06	2.24
LOC110257896	0.9	1	0.8	1	1	1	1e-13	2e-10	0.7	1	0.8	1	-0.26	-0.35	0.04	0.14	-5.85	0.31	-0.07	-6.23	-5.92	0.19	-0.04	-6.15
LOC110260685	0.4	1	0.0004	0.1	2e-11	1e-07	0.005	1	0.2	1	0.3	1	-0.48	-0.11	3.78	3.41	2.93	0.56	-0.06	2.32	2.37	0.88	1.72	3.22
IGHG	9e-11	5e-07	0.05	1	0.3	1	0.3	1	0.9	1	0.5	1	-0.51	-3.86	-4.66	-1.3	0.85	-1.5	-1.09	1.26	-0.75	-5.38	-3.27	1.36
CHRNA2	2e-07	0.0004	1e-10	3e-07	0.0001	0.2	3e-05	0.01	0.001	1	0.7	1	1.78	-0.72	-0.14	2.36	0.52	2.3	1.81	0.03	-1.88	-2.52	1.79	2.44
NTS	4e-05	0.04	1e-09	2e-06	0.02	1	0.0002	0.08	0.005	1	0.3	1	1.06	-0.18	0.05	1.29	0.2	0.88	1.58	0.9	-1.43	-1.78	2.47	2.81
AHNAK2	8e-05	0.07	1e-09	2e-06	0.008	1	5e-05	0.03	0.02	1	0.2	1	2.28	0.11	0.05	2.23	-0.12	2.37	2.17	-0.32	-2.13	-1.98	2.38	2.23
CALB1	0.0001	0.08	1e-09	2e-06	0.02	1	2e-06	0.001	0.001	0.8	0.4	1	1.66	0.55	-0.26	0.86	-0.69	0.92	1.61	0	-2.17	-1.66	2.02	1.52
PCP4	0.0004	0.2	2e-09	2e-06	0.008	1	1e-05	0.007	0.001	0.8	1	1	2.05	0.54	0.21	1.72	-0.54	1.49	2.32	0.29	-2.03	-1.51	2.61	2.09
FOXB1	2e-05	0.02	2e-09	2e-06	0.07	1	6e-05	0.03	0.02	1	0.6	1	1.2	-0.15	-0.41	0.94	0.08	0.88	1.24	0.44	-1.87	-2.17	2.04	2.34
DLK1	0.006	1	2e-09	3e-06	0.5	1	2e-06	0.002	0.003	1	1	1	2.05	1.32	-0.4	0.33	-1.22	0.38	2.14	0.54	-2.42	-1.53	2.92	2.03
KRT8	0.01	1	7e-05	0.03	0.3	1	3e-09	3e-06	0.0002	0.2	1e-05	0.05	-0.11	4.87	1.53	-3.45	-3.68	-3.05	0.39	-0.25	-1.88	0.7	3.47	0.89
NEXN	0.0001	0.09	7e-09	8e-06	0.001	1	5e-06	0.003	0.0006	0.6	0.6	1	1.85	0.39	0.28	1.75	-0.56	1.51	2.08	0.02	-2.05	-1.54	2.2	1.69
LHB	0.3	1	0.0001	0.06	0.5	1	1e-08	1e-05	8e-05	0.1	0.6	1	3.13	3.35	0.16	-0.05	-3.22	0.13	3.24	-0.12	-3.16	0.32	3.36	-0.12
ZFY	1	1	0.8	1	0.8	1	2e-08	1e-05	1	1	0.7	1	-0.31	-0.41	0.05	0.16	-4.02	-0.12	-0.08	-3.98	-3.91	0.11	-0.09	-4.1
CD5L	3e-08	8e-05	0.01	1	0.4	1	0.004	1	0.2	1	0.6	1	0.55	-2.65	-2.69	0.5	-0.12	0.18	0.7	0.4	-1.41	-3.71	-1.86	0.44
LHX9	0.0008	0.5	3e-08	3e-05	0.01	1	6e-07	0.0004	0.001	0.8	0.5	1	1.79	0.94	0.4	1.26	-1.19	0.91	2.1	0	-2.37	-1.29	2.48	1.4
LOC110258704	3e-08	8e-05	0.3	1	0.2	1	0.09	1	0.2	1	0.2	1	-0.2	-4.09	-4.24	-0.35	-0.61	-0.14	-0.6	-1.06	-0.66	-4.08	-4.23	-0.81
POMC	0.9	1	7e-06	0.004	0.8	1	4e-08	3e-05	2e-05	0.03	0.8	1	2.76	2.93	0.17	-0.01	-2.8	0.02	3.02	0.21	-2.79	0.06	3.19	0.33
ACP7	2e-07	0.0004	5e-07	0.0004	4e-08	0.0001	0.0003	0.1	1e-05	0.02	0.01	1	0.58	-1.2	-0.28	1.51	0.6	1.53	0.65	-0.29	-0.65	-1.63	-0.01	0.97
LOC100152327	1e-07	0.0003	0.02	1	0.2	1	0.7	1	0.5	1	0.6	1	-0.06	-2.84	-3.96	-1.19	1.45	-1.09	-1.4	1.14	-0.54	-4.44	-2.36	1.53
ISM1	0.002	1	2e-07	0.0001	0.008	1	7e-06	0.004	0.0004	0.4	0.6	1	1.86	0.82	0.44	1.48	-0.95	1.05	2.31	0.31	-1.97	-1.06	2.36	1.45
FAM83B	0.02	1	2e-07	0.0002	0.0009	1	6e-07	0.0005	8e-06	0.02	0.001	1	0.65	1.58	1.32	0.39	-1.66	-0.71	1.59	0.64	-1.34	0.27	2.58	0.98
POU1F1	0.8	1	0.0008	0.3	0.7	1	2e-07	0.0002	5e-05	0.07	0.6	1	2.37	2.49	0.29	0.18	-2.7	-0.11	2.65	0.06	-2.49	0.33	2.55	-0.27
NTNG1	0.002	0.8	4e-07	0.0003	0.01	1	0.0001	0.05	0.007	1	0.5	1	1.16	0.41	0.53	1.29	-0.47	0.91	1.52	0.13	-1.6	-1.11	2.09	1.6
PRG4	0.02	1	0.2	1	0.5	1	0.001	0.4	0.2	1	5e-07	0.003	-2.67	2.86	2.39	-3.14	-1.84	-3.53	-2.28	-0.59	-1.22	1.1	3.64	1.32
C3H16orf89	6e-07	0.0009	0.8	1	0.0007	0.9	0.5	1	0.5	1	0.1	1	-1.34	4.08	1.87	-3.55	-0.23	-1.38	-1.6	-0.45	-0.88	1.04	3.55	1.63
DKK2	0.0005	0.3	1e-06	0.001	0.006	1	0.0004	0.1	0.006	1	0.6	1	1.32	0	0.11	1.42	-0.16	1.24	1.5	0.1	-1.43	-1.35	1.53	1.45
VILL	0.0003	0.2	2e-06	0.001	0.02	1	9e-05	0.04	0.009	1	0.6	1	1.29	0.06	-0.07	1.16	-0.36	1.03	1.41	0.01	-1.72	-1.55	1.49	1.32
E2F7	0.005	1	2e-06	0.001	0.06	1	1e-05	0.007	0.003	1	0.5	1	2.33	0.82	-0.21	1.31	-1.02	1.44	2.2	-0.26	-2.2	-1.21	1.94	0.95
C7	3e-06	0.004	0.6	1	0.003	1	0.4	1	0.2	1	0.3	1	-1.16	3.44	1.53	-3.07	0.64	-1.01	-1.79	-0.13	-0.28	1.19	2.66	1.2
MARCO	4e-06	0.005	0.6	1	0.4	1	0.1	1	0.3	1	0.5	1	0.17	-4.15	-4.95	-0.63	-1.98	-1.67	-0.29	-0.6	-0.71	-4.39	-4.68	-1
CEACAM16	0.02	1	4e-06	0.003	0.03	1	0.0003	0.1	0.02	1	0.9	1	1.59	0.74	0.63	1.48	-0.68	1.19	1.89	0.01	-1.68	-0.84	2.27	1.43
GRID2IP	0.001	0.7	5e-06	0.003	0.2	1	0.0001	0.05	0.04	1	0.4	1	1.91	0.27	-0.35	1.29	-0.54	1.4	1.77	-0.16	-2	-1.62	1.6	1.22
FAM163A	0.001	0.7	5e-06	0.003	0.002	1	0.0008	0.3	0.003	1	0.06	1	0.46	0.04	0.63	1.04	-0.17	0.39	1.08	0.52	-0.91	-0.79	1.56	1.44
SLC2A7	7e-06	0.007	0.5	1	0.003	1	0.3	1	0.5	1	0.2	1	-1.18	4.11	1.82	-3.47	-0.48	-1.17	-1.48	-0.79	-1.13	1.1	3.11	0.88
PLXDC1	0.004	1	2e-05	0.009	0.004	1	0.006	1	0.02	1	0.7	1	0.97	-0.02	0.75	1.74	0.07	1.19	1.44	0.32	-0.99	-0.95	1.71	1.68
UBD	0.8	1	0.01	1	2e-05	0.03	0.09	1	0.06	1	0.003	1	1.28	-1.02	-3.76	-1.46	-0.41	-1.24	-0.84	-0.01	0.62	-2.06	-2.89	-0.2
MFAP5	0.3	1	0.05	1	0.8	1	0.02	1	0.1	1	2e-05	0.05	-2.05	1.87	1.09	-2.83	-0.97	-2.79	-1.76	0.06	-0.41	0.7	1.55	0.44
LOC110256276	0.03	1	0.2	1	2e-05	0.03	0.02	1	0.3	1	0.2	1	-0.51	-1.08	1.88	2.44	2.05	0.81	0.47	1.72	1.94	-0.06	-0.09	1.91
CPS1	0.8	1	0.03	1	0.04	1	0.004	1	2e-05	0.03	0.001	1	0.14	-0.52	-0.23	0.43	0.64	1.03	-0.41	-0.8	0.05	-0.34	-0.42	-0.04
SFRP5	0.7	1	0.07	1	0.6	1	0.002	0.6	0.06	1	2e-05	0.06	-1.71	1.38	1.05	-2.04	-1.43	-2.63	-1.23	-0.03	-0.7	0.48	1.57	0.39
SLC4A1	0.004	1	0.003	0.8	0.009	1	0.001	0.4	2e-05	0.03	0.02	1	0.51	-0.27	-0.3	0.48	-0.62	-0.15	1.11	0.63	-0.44	-0.61	0.07	0.23
LOC100525692	0.1	1	3e-05	0.02	0.2	1	0.2	1	0.7	1	0.2	1	-0.95	-0.25	0.66	-0.04	2.21	-0.22	-1.47	0.96	0.51	-0.39	2.13	3.03
CPNE9	0.04	1	3e-05	0.02	0.1	1	0.0002	0.07	0.005	1	0.8	1	1.86	0.9	0.07	1.03	-0.96	0.93	2.02	0.13	-1.75	-0.78	1.93	0.96
EPGN	0.007	1	5e-05	0.03	0.05	1	0.002	0.5	0.03	1	1	1	1.21	0.22	0.13	1.12	-0.32	1.03	1.31	-0.05	-1.35	-1.04	1.41	1.1
EPCAM	0.3	1	0.004	0.9	0.4	1	5e-05	0.03	0.008	1	0.3	1	1.01	1.17	0.19	0.03	-1.65	-0.32	1.22	-0.11	-1.67	-0.26	1.44	0.03
VIPR2	0.008	1	6e-05	0.03	0.1	1	0.001	0.4	0.02	1	0.4	1	0.85	0.23	-0.17	0.45	-0.37	0.36	0.95	0.22	-1.17	-1.03	1.18	1.04
LOC106505355	7e-05	0.07	0.03	1	0.9	1	0.7	1	0.6	1	0.6	1	0.08	1.59	1.47	-0.03	-0.08	0.53	-0.2	-0.81	-0.03	3.12	0.85	-2.3
MSX1	0.8	1	0.003	0.8	0.3	1	9e-05	0.04	0.002	1	0.1	1	0.81	1.64	0.67	-0.15	-1.71	-0.6	1.26	0.15	-1.37	0.35	1.83	0.11
LOC106504234	0.7	1	0.1	1	9e-05	0.2	0.4	1	0.02	1	0.004	1	0.71	-1.17	-3.17	-1.3	-0.57	-1.17	-0.81	-0.21	-0.21	-2.24	-2.31	-0.28
SYNDIG1L	0.02	1	0.0001	0.05	0.2	1	0.003	0.9	0.02	1	0.8	1	1.15	0.36	-0.13	0.67	-0.35	0.6	1.27	0.32	-1.13	-0.91	1.35	1.13
LOC110261683	0.0002	0.2	0.0001	0.07	0.02	1	0.2	1	0.1	1	0.02	1	-0.68	-1.11	-0.39	0.04	1.1	-0.07	-0.64	0.53	-0.03	-1.3	0.14	1.41
LDLRAD2	0.1	1	0.0002	0.07	0.0009	1	0.7	1	0.05	1	0.1	1	-0.42	-0.13	1.38	1.09	1.58	0.24	0	1.34	1.14	0.29	1.11	1.96
P = P-value ; FDR = FDR-adjusted P-value (FDR)
Interaction (*) of main effect of weaning, maternal immune activation (MIA), and sex
C=control, P = MIA, F = female, M = male, W = weaned, N = nursed.

## Sheet: Readme
Interacting impact of maternal inflammatory response and stress on the amygdala transcriptome
Marissa R. Keever1, Pan Zhang2, Courtni R. Bolt1, Adrienne Antonson1, Haley E. Rymut3, Megan P. Corbett1, Alexandra Houser1, Alvaro G. Hernandez3, Bruce Southey1, Laurie Rund1, Rodney Johnson1,4, Sandra L. Rodriguez-Zas1,3,5,6*
1 Department of Animal Sciences, University of Illinois at Urbana-Champaign, Urbana, IL, USA
2 Illinois Informatics Institute, University of Illinois at Urbana-Champaign, Urbana, IL, USA
3 High-throughput Sequencing and Genotyping Unit, Roy J. Carver Biotechnology Center, University of Illinois at Urbana-Champaign, Urbana, IL, USA
4 Neuroscience Program, University of Illinois at Chicago, Chicago, IL, USA
5 Department of Statistics, University of Illinois at Urbana-Champaign, Urbana, IL, USA
6 Carl R. Woese Institute for Genomic Biology, University of Illinois at Urbana-Champaign, Urbana, IL, USA
* Corresponding Author:
Dr. Sandra Rodriguez-Zas: rodrgzzs@illinois.edu
